# Supplementary material for: Regulation of Benzo[a]pyrene-Induced Hepatic Lipid Accumulation through CYP1B1-Induced mTOR-Mediated Lipophagy
Source: MDPI journal article supplement (doi:10.3390/ijms25021324), 2024-01-22
Supplement: s1 [file s1]

Supplementary Table S1. Sequences of all siRNAs for CYP1A1 and CYP1B1 knockdown

| siRNA   |           | Duplex sequence           | MW                    |        |
|---------|-----------|---------------------------|-----------------------|--------|
| Control | Sense     | CCUCGUGCCGUUCCAUCAGGUAGUU | 7487.7                |        |
|         | Antisense | CUACCUGAUGGAACGGCACGAGGUU | 7636.9                |        |
| CYP1A1  | 1         | Sense                     | CUGGUAUUCUGGGUAAUCAUU | 6316.1 |
|         |           | Antisense                 | UGAUUACCCAGAAUACCAGUU | 6305.1 |
|         | 2         | Sense                     | GUAUCAGUGACCAAUGUCAUU | 6322.1 |
|         |           | Antisense                 | UGACAUUGGUCACUGAUACUU | 6299.1 |
|         | 3         | Sense                     | CCUUCAAGGACCUGAAUGAUU | 5321.1 |
|         |           | Antisense                 | UCAUUCAGGUCCUUGAAGGUU | 6315.1 |
|         | 4         | Sense                     | CACAACAAGAGACACAAGUUU | 6374.2 |
|         |           | Antisense                 | ACUUGUGUCUCUUGUUGUGUU | 6247   |
|         | 5         | Sense                     | GUGAGAAGGUGAUUAUCUUUU | 6380.2 |
|         |           | Antisense                 | AAGAUAAUCACCUUCUCACUU | 6226.1 |
| CYP1B1  | 1         | Sense                     | GCAUGAUGCGCAACUUCUUUU | 6275.1 |
|         |           | Antisense                 | AAGAAGUUGCGCAUCAUGCUU | 6361.2 |
|         | 2         | Sense                     | GCAACUUCAGCAACUUCAUUU | 6242.1 |
|         |           | Antisense                 | AUGAAGUUGCUGAAGUUGCUU | 6379.2 |
|         | 3         | Sense                     | GCGAAGAACUUUCUAAGAUUU | 6346.2 |
|         |           | Antisense                 | AUCUUAGAAAGUUCUUCGCUU | 6260.1 |
|         | 4         | Sense                     | CAGUUAUGGUCUAACCAUUUU | 6260.1 |
|         |           | Antisense                 | AAUGGUUAGACCAUAACUGUU | 6346.2 |
|         | 5         | Sense                     | CCAUUAAACCCAAGUCAUUUU | 6226.1 |
|         |           | Antisense                 | AAUGACUUGGGUUUAAUGGUU | 6380.2 |

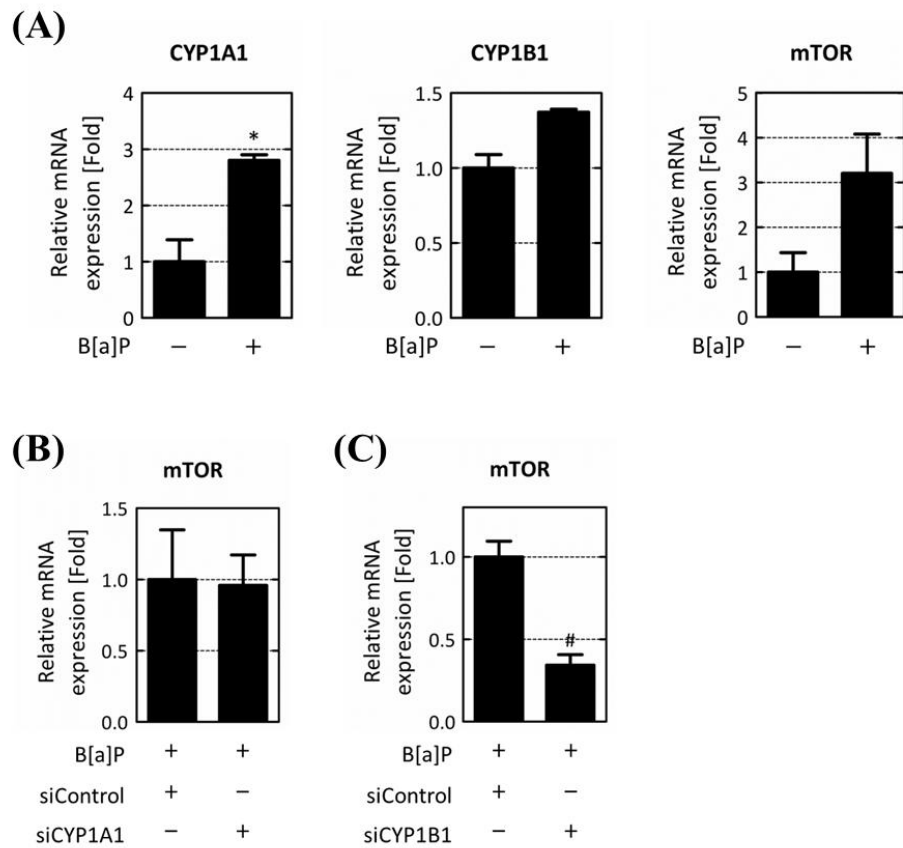

**Supplementary Figure S1. mRNA levels of CYP1A1, CYP1B1, and mTOR after B[a]P treatment and knockdown of CYP1A1 and CYP1B1.** (A) mRNA levels of CYP1A1, CYP1B1, and mTOR upon B[a]P treatment were analyzed by RT-qPCR. Relative mTOR mRNA expression levels were investigated by RT-qPCR following (B) CYP1A1 and (C) CYP1B1 knockdown, respectively. \*  $p < 0.05$ , compared with the non-treated group; #  $p < 0.05$ , compared with the siControl group. B[a]P: benzo[a]pyrene (10  $\mu$ M).

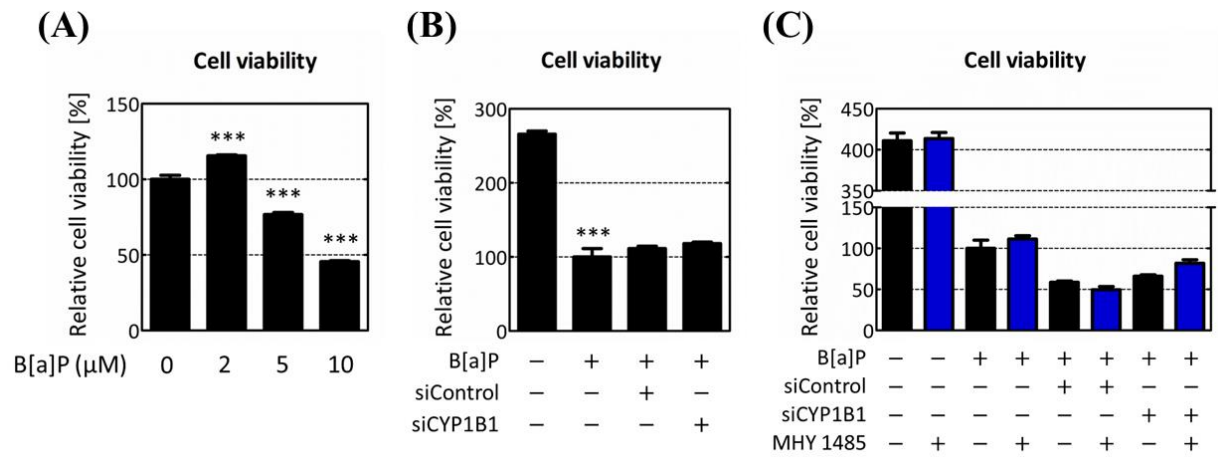

**Supplementary Figure S2. Cell viability in response to treatment with B[a]P, siRNA, and MHY 1485.** (A) Cell viability levels are represented in the graph over a range of B[a]P concentrations from 2 μM to 10 μM. (B) The cell viability levels according to CYP1B1 knockdown are shown in the graph. (C) Cell viability according to MHY 1485 was analyzed. \*\*\*  $p < 0.001$ , compared with the non-treated group. B[a]P: benzo[a]pyrene (10 μM); MHY 1485: mTOR activator (2 μM).

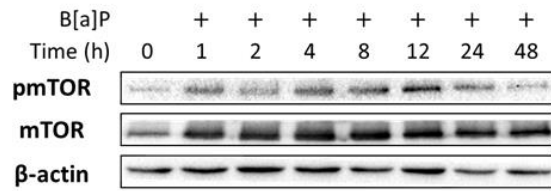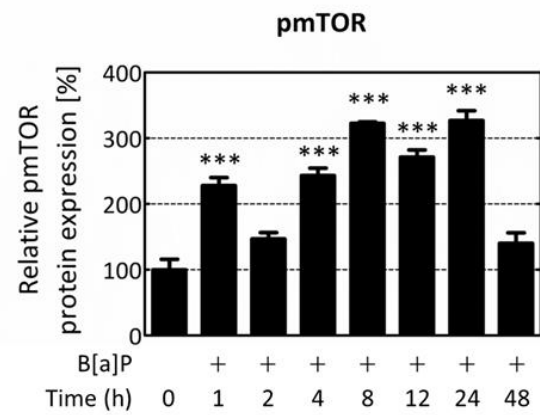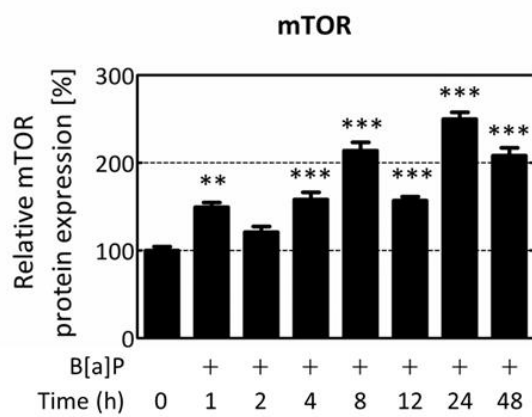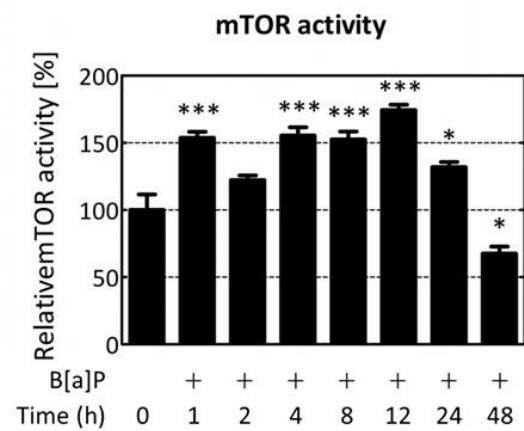

**Supplementary Figure S3. Expression and activity of mTOR over the time course.** pmTOR and mTOR protein expressions in response to B[a]P treatment were assessed by Western blot analysis to determine the optimal time period for treatment. Protein expression levels of pmTOR and mTOR were confirmed in the treatment range from 1 h to 48 h, and mTOR activity was confirmed accordingly. \*  $p < 0.05$ , \*\*  $p < 0.01$ , \*\*\*  $p < 0.001$ , compared with the control group. B[a]P: benzo[a]pyrene (10  $\mu$ M).

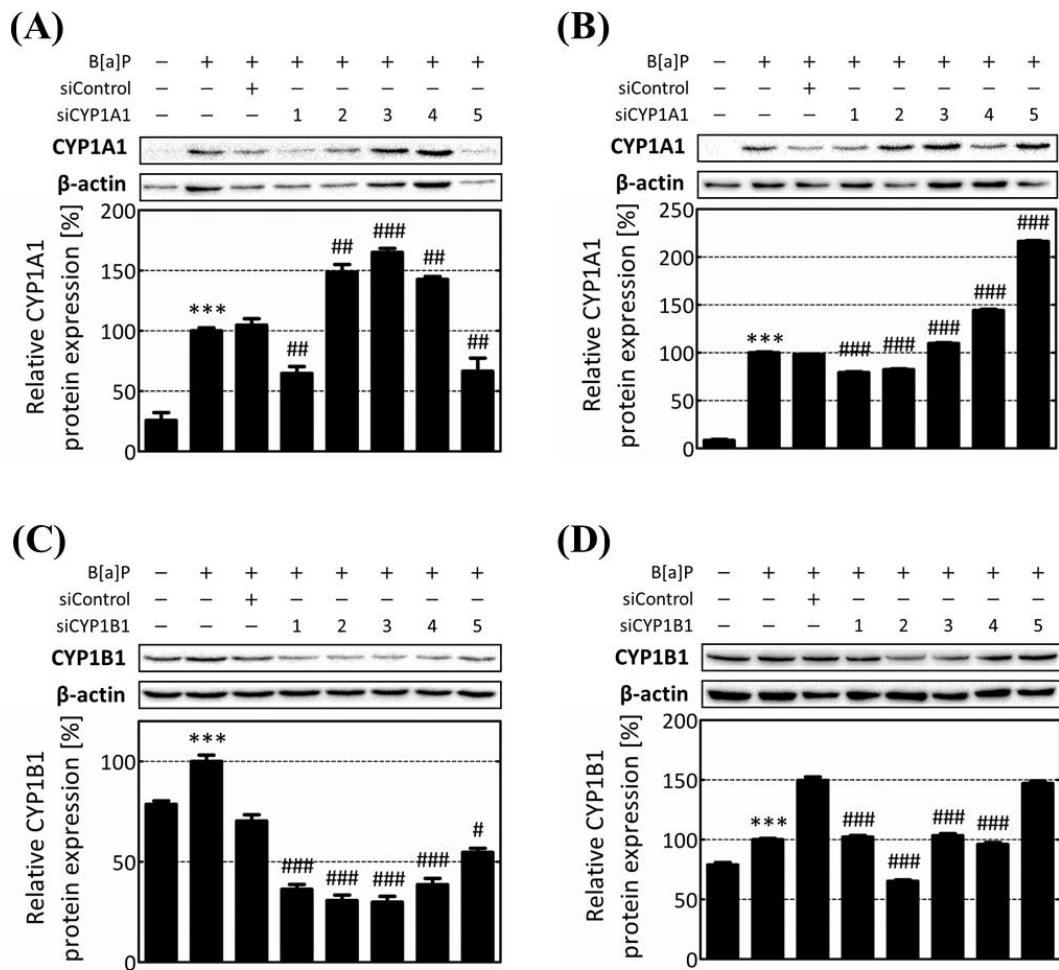

**Supplementary Figure S4. Knockdown efficiency of CYP1A1 and CYP1B1 siRNAs.** To select the optimal siRNA, the knockdown efficiencies for CYP1A1 and CYP1B1 siRNAs were confirmed. Knockdown efficiency of CYP1A1 siRNA over **(A)** 24 h and **(B)** 48 h. Knockdown efficiency of CYP1B1 siRNA over **(C)** 24 h and **(D)** 48 h. \*\*\*  $p < 0.001$ , compared with the non-treated group; #  $p < 0.05$ , ##  $p < 0.01$ , ###  $p < 0.001$ , compared with the siControl group. B[a]P: benzo[a]pyrene (10  $\mu\text{M}$ ).
